# Supplementary material
Source: publisher figshare collection journal article supplement (https://sage.figshare.com/ndownloader/files/17890151)
Supplement: Supplementary file 1 [file 17890151]

### Appendix: Critical Gameplay Activities Scale

Instructions: The following list was generated by players. Please consider the following in-game actions that *may* happen during an average League of Legends game. Please consider the role you play most often.

| <b>Question:</b> <i>When the situation arises, how important is it to do each of the following?</i> | Not at all important |   |   |   |   |   | Extremely Important |
|-----------------------------------------------------------------------------------------------------|----------------------|---|---|---|---|---|---------------------|
|                                                                                                     | 1                    | 2 | 3 | 4 | 5 | 6 | 7                   |
| 1. Dodge an enemy ability                                                                           | 1                    | 2 | 3 | 4 | 5 | 6 | 7                   |
| 2. Place control wards                                                                              | 1                    | 2 | 3 | 4 | 5 | 6 | 7                   |
| 3. Place wards in allied territory (3)                                                              | 1                    | 2 | 3 | 4 | 5 | 6 | 7                   |
| 4. Place ward in neutral territory (i.e., river)                                                    | 1                    | 2 | 3 | 4 | 5 | 6 | 7                   |
| 5. Place ward in enemy territory                                                                    | 1                    | 2 | 3 | 4 | 5 | 6 | 7                   |
| 6. Destroy enemy wards                                                                              | 1                    | 2 | 3 | 4 | 5 | 6 | 7                   |
| 7. Destroy tier 1 turret                                                                            | 1                    | 2 | 3 | 4 | 5 | 6 | 7                   |
| 8. Destroy tier 2 turret                                                                            | 1                    | 2 | 3 | 4 | 5 | 6 | 7                   |
| 9. Destroy inhibitor turret                                                                         | 1                    | 2 | 3 | 4 | 5 | 6 | 7                   |
| 10. Destroy nexus turret                                                                            | 1                    | 2 | 3 | 4 | 5 | 6 | 7                   |

|                                               |   |   |   |   |   |   |   |
|-----------------------------------------------|---|---|---|---|---|---|---|
| 11. Destroy<br>nexus                          | 1 | 2 | 3 | 4 | 5 | 6 | 7 |
| 12. Kill Rift<br>Herald                       | 1 | 2 | 3 | 4 | 5 | 6 | 7 |
| 13. Kill Baron                                | 1 | 2 | 3 | 4 | 5 | 6 | 7 |
| 14. Kill Cloud<br>Drake                       | 1 | 2 | 3 | 4 | 5 | 6 | 7 |
| 15. Kill<br>Mountain<br>Drake                 | 1 | 2 | 3 | 4 | 5 | 6 | 7 |
| 16. Kill<br>Ocean Drake                       | 1 | 2 | 3 | 4 | 5 | 6 | 7 |
| 17. Kill<br>Infernal<br>Drake                 | 1 | 2 | 3 | 4 | 5 | 6 | 7 |
| 18. Kill Elder<br>Dragon                      | 1 | 2 | 3 | 4 | 5 | 6 | 7 |
| 19. Ping: Red<br>Alert                        | 1 | 2 | 3 | 4 | 5 | 6 | 7 |
| 20. Ping:<br>Yellow<br>Caution                | 1 | 2 | 3 | 4 | 5 | 6 | 7 |
| 21. Ping: Blue<br>Instant                     | 1 | 2 | 3 | 4 | 5 | 6 | 7 |
| 22. Ping:<br>Help/Assist<br>Me                | 1 | 2 | 3 | 4 | 5 | 6 | 7 |
| 23. Ping: On<br>My Way                        | 1 | 2 | 3 | 4 | 5 | 6 | 7 |
| 24. Ping:<br>Enemy<br>Missing                 | 1 | 2 | 3 | 4 | 5 | 6 | 7 |
| 25. Access the<br>TAB screen<br>(i.e., player | 1 | 2 | 3 | 4 | 5 | 6 | 7 |

|                                                           |   |   |   |   |   |   |   |
|-----------------------------------------------------------|---|---|---|---|---|---|---|
| build and<br>information)                                 |   |   |   |   |   |   |   |
| 26. Access<br>death recap<br>screen                       | 1 | 2 | 3 | 4 | 5 | 6 | 7 |
| 27. Rotate<br>lanes (i.e.,<br>change lanes<br>with group) | 1 | 2 | 3 | 4 | 5 | 6 | 7 |
| 28. Kill<br>enemy jungle<br>camp                          | 1 | 2 | 3 | 4 | 5 | 6 | 7 |
| 29. Peel high<br>threat target                            | 1 | 2 | 3 | 4 | 5 | 6 | 7 |
| 30. Work as a<br>team (i.e.,<br>group for<br>objectives)  | 1 | 2 | 3 | 4 | 5 | 6 | 7 |
| 31. Roam to<br>enemy<br>territory                         | 1 | 2 | 3 | 4 | 5 | 6 | 7 |
| 32. Roam to<br>allied territory                           | 1 | 2 | 3 | 4 | 5 | 6 | 7 |
| 33. Roam to<br>neutral<br>territory                       | 1 | 2 | 3 | 4 | 5 | 6 | 7 |
| 34. Gank (i.e.,<br>roam and<br>attack/engage<br>enemy)    | 1 | 2 | 3 | 4 | 5 | 6 | 7 |
| 35. Counter<br>gank (i.e.,<br>roam and<br>counterattack)  | 1 | 2 | 3 | 4 | 5 | 6 | 7 |

|                                                                         |   |   |   |   |   |   |   |
|-------------------------------------------------------------------------|---|---|---|---|---|---|---|
| 36. Join engagement normally                                            | 1 | 2 | 3 | 4 | 5 | 6 | 7 |
| 37. Use special ability (e.g., teleport or ultimate) to join engagement | 1 | 2 | 3 | 4 | 5 | 6 | 7 |
| 38. Kill enemies                                                        | 1 | 2 | 3 | 4 | 5 | 6 | 7 |
| 39. Avoid deaths                                                        | 1 | 2 | 3 | 4 | 5 | 6 | 7 |
| 40. Obtain assists                                                      | 1 | 2 | 3 | 4 | 5 | 6 | 7 |
| 41. Engage enemies                                                      | 1 | 2 | 3 | 4 | 5 | 6 | 7 |
| 42. Disengage encounters                                                | 1 | 2 | 3 | 4 | 5 | 6 | 7 |
| 43. Contest objectives (e.g., Baron, Rift, or Drakes)                   | 1 | 2 | 3 | 4 | 5 | 6 | 7 |

---

Not at all important

Extremely Important

---
